# Supplementary material
Source: HighWire-hosted journal article supplement (https://cancerdiscovery.aacrjournals.org/content/suppl/2012/04/17/2159-8290.CD-11-0320)

**A**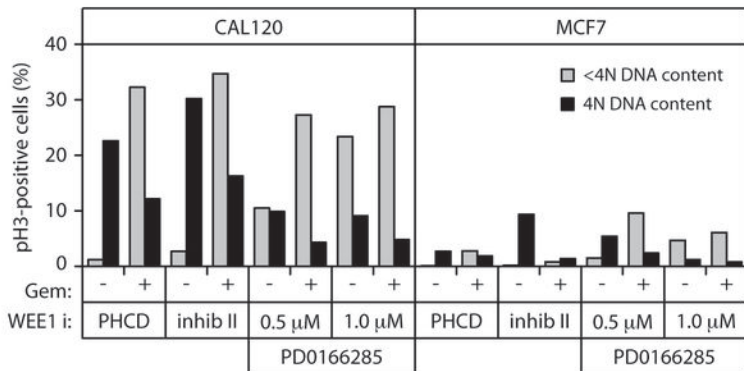**B**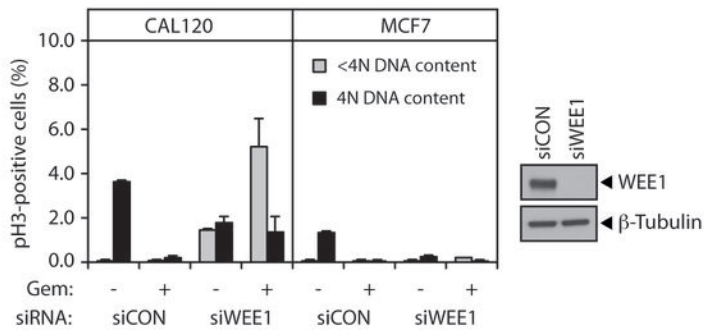

Supplement: F1_95K.pdf [file F1_95K.pdf]
